# Supplementary material for: Effects of calcimimetics on long-term outcomes in dialysis patients: literature review and Bayesian meta-analysis
Source: Atypon-hosted journal article supplement (doi:10.2217/cer-2018-0015), 2018-05-15
Supplement: supplementary_materials.docx [file supplementary_materials.docx]

**Additional Files**

**Additional File 1**

The search strategy was conducted on April 3, 2014 in the following databases:

Embase <1974 to 2014 April 02>

Ovid MEDLINE(R) In-Process & Other Non-Indexed Citations and Ovid MEDLINE(R) <1946 to Present>

1 chronic kidney disease.ab,ti. (45156)

2 exp Renal Insufficiency, Chronic/ (135216)

3 chronic kidney failure.ab,ti. (2062)

4 exp renal dialysis/ (224440)

5 (hemodialysis or haemodialysis).ab,ti. (129174)

6 exp dialysis/ (70291)

7 dialysis.ab,ti. (182799)

8 1 or 2 or 3 or 4 or 5 or 6 or 7 (440185)

9 cinacalcet.ab,ti. (1727)

10 mimpara.ab,ti. (54)

11 sensipar.ab,ti. (68)

12 (R586 or R-586 or "R 586").ab,ti. (22)

13 (AMG073 or AMG-073 or "AMG 073").ab,ti. (52)

14 (KRN1493 or KRN-1493 or "KRN 1493").ab,ti. (15)

15 exp calcimimetic agent/ (814)

16 calcimimetic.ab,ti. (1075)

17 9 or 10 or 11 or 12 or 13 or 14 or 15 or 16 (2781)

18 8 and 17 (1505)

19 Epidemiologic studies/ (182487)

20 exp case control studies/ (732251)

21 exp cohort studies/ (1493870)

22 case control.tw. (166297)

23 (cohort adj (study or studies)).tw. (194335)

24 cohort analy$.tw. (8484)

25 (follow up adj (study or studies)).tw. (82248)

26 (observational adj (study or studies)).tw. (105668)

27 longitudinal.tw. (307292)

28 retrospective.tw. (654751)

29 cross sectional.tw. (366653)

30 cross-sectional studies/ (281568)

31 or/19-30 (3104023)

32 randomized controlled trials as topic/ (140765)

33 randomized controlled trial/ (710880)

34 random allocation/ (141376)

35 double blind method/ (239626)

36 single blind method/ (36836)

37 clinical trial/ (1319895)

38 clinical trial, phase i.pt. (13974)

39 clinical trial, phase ii.pt. (22438)

40 clinical trial, phase iii.pt. (8773)

41 clinical trial, phase iv.pt. (915)

42 controlled clinical trial.pt. (88072)

43 randomized controlled trial.pt. (369795)

44 multicenter study.pt. (169480)

45 clinical trial.pt. (486086)

46 exp Clinical Trials as topic/ (375843)

47 or/32-46 (2075178)

48 (clinical adj trial$).tw. (489124)

49 ((singl$ or doubl$ or treb$ or tripl$) adj (blind$3 or mask$3)).tw. (289175)

50 PLACEBOS/ (281344)

51 placebo$.tw. (356710)

52 randomly allocated.tw. (36857)

53 (allocated adj2 random$).tw. (42284)

54 or/48-53 (1042578)

55 47 or 54 (2483132)

56 case report.tw. (466002)

57 letter/ (1646103)

58 historical article/ (299588)

59 or/56-58 (2395874)

60 55 not 59 (2419544)

61 31 or 60 (5167840)

62 18 and 61 (657)

63 62 use prmz (251)

64 exp chronic kidney disease/ (112005)

65 chronic kidney disease.ab,ti. (45156)

66 exp chronic kidney failure/ (130432)

67 chronic kidney failure.ab,ti. (2062)

68 exp hemodialysis/ (163837)

69 (hemodialysis or haemodialysis).ab,ti. (129174)

70 exp dialysis/ (70291)

71 dialysis.ab,ti. (182799)

72 64 or 65 or 66 or 67 or 68 or 69 or 70 or 71 (429919)

73 exp cinacalcet/ (1881)

74 cinacalcet.ab,ti. (1727)

75 mimpara.ab,ti. (54)

76 sensipar.ab,ti. (68)

77 exp calcimimetic agent/ (814)

78 calcimimetic.ab,ti. (1075)

79 (R586 or R-586 or "R 586").ab,ti. (22)

80 (AMG073 or AMG-073 or "AMG 073").ab,ti. (52)

81 (KRN1493 or KRN-1493 or "KRN 1493").ab,ti. (15)

82 73 or 74 or 75 or 76 or 77 or 78 or 79 or 80 or 81 (3441)

83 72 and 82 (1874)

84 Clinical study/ (99401)

85 Case control study/ (254794)

86 Family study/ (10330)

87 longitudinal study/ (149378)

88 retrospective study/ (820398)

89 prospective study/ (605900)

90 Randomized controlled trials/ (140765)

91 89 not 90 (600252)

92 cohort analysis/ (325873)

93 (cohort adj (study or studies)).mp. (320588)

94 (case control adj (study or studies)).tw. (136092)

95 (follow up adj (study or studies)).tw. (82248)

96 (observational adj (study or studies)).tw. (105668)

97 (epidemiologic$ adj (study or studies)).tw. (133388)

98 (cross sectional adj (study or studies)).tw. (149965)

99 or/84-88,91-98 (2500295)

100 clinical trial/ (1319895)

101 randomized controlled trial/ (710880)

102 Randomization/ (141376)

103 single blind procedure/ (18030)

104 double blind procedure/ (114871)

105 crossover procedure/ (38331)

106 placebo/ (248894)

107 Randomi?ed controlled tiral$.tw. (1)

108 Rct.tw. (21910)

109 random allocation.tw. (2453)

110 randomly allocated.tw. (36857)

111 allocated randomly.tw. (3635)

112 (allocated adj2 random).tw. (1499)

113 single blind$.tw. (25580)

114 Double blind$.tw. (259708)

115 ((treble or triple) adj blind$).tw. (698)

116 Placebo$.tw. (356710)

117 Prospective study/ (605900)

118 or/100-117 (2367520)

119 Case study/ (1696335)

120 Case report.tw. (466002)

121 Abstract report/ or letter/ (1735634)

122 or/119-121 (3555371)

123 118 not 122 (2305986)

124 99 or 123 (4124747)

125 83 and 124 (693)

126 125 use oemezd (502)

127 limit 126 to (conference abstract or conference paper or "conference review" or conference proceeding) [Limit not valid in Ovid MEDLINE(R),Ovid MEDLINE(R) In-Process; records were retained] (70)

128 126 not 127 (432)

129 63 or 128 (683)

130 remove duplicates from 129 (516)
